# Supplementary material
Source: publisher figshare collection journal article supplement (https://frontiersin.figshare.com/ndownloader/files/14535983)

## LG1-FH

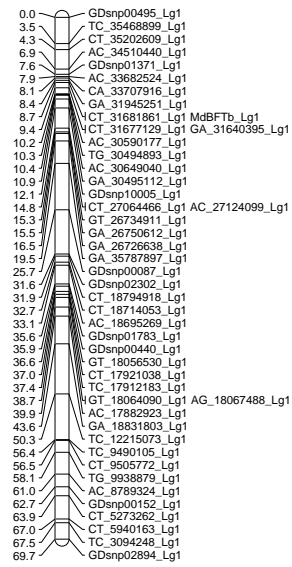

## LG1-M13

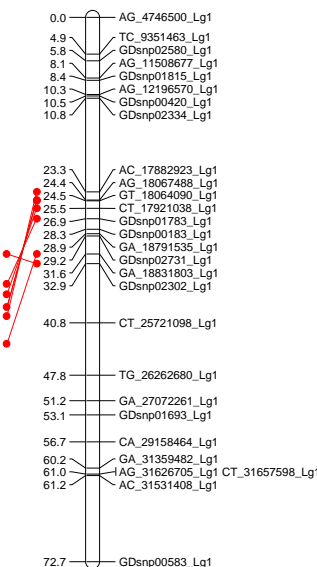

## LG2-FH

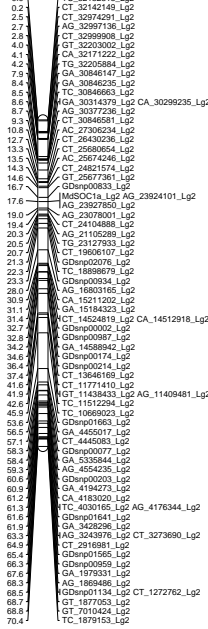

## LG2-M13

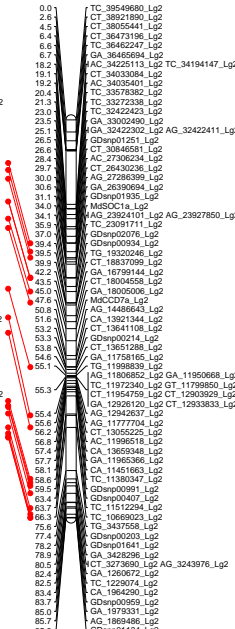

## LG3-FH

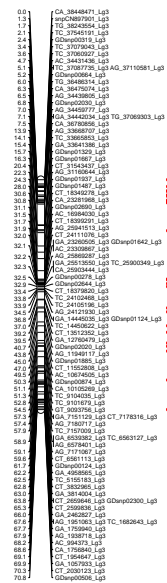

## LG3-M13

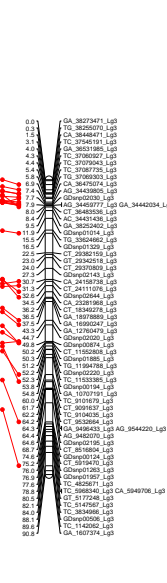

## LG4-FH

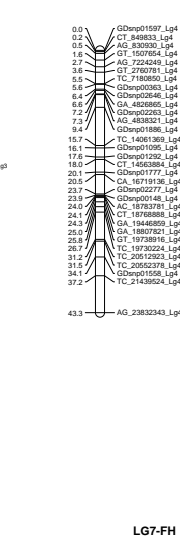

## LG4-M13

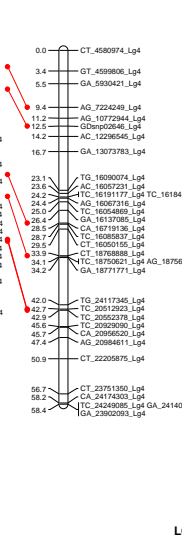

## LG5-FH

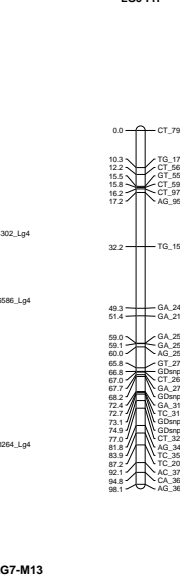

## LG5-M13

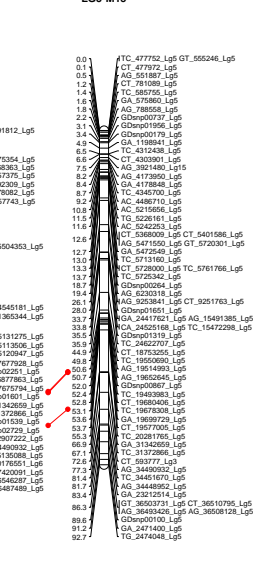

## LG6-FH

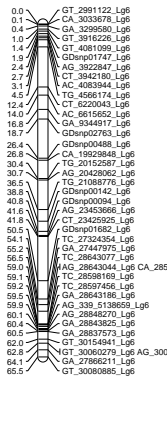

## LG6-M13

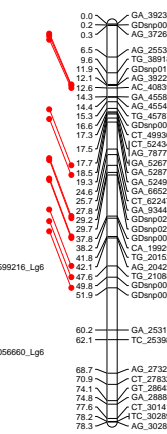

## LG7-FH

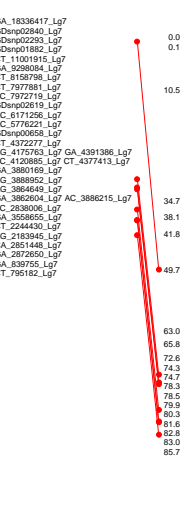

## LG7-M13



## LG8-FH

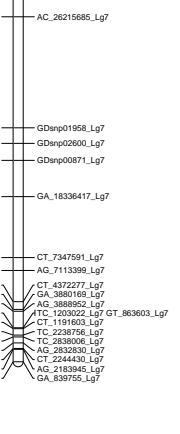

## LG8-M13

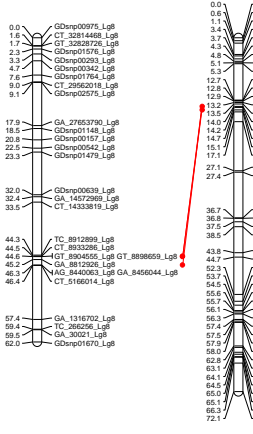

LG9-FH

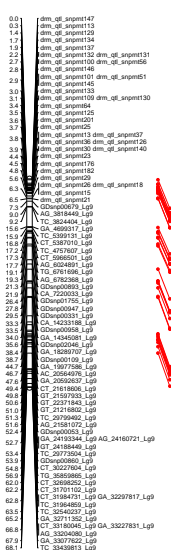

LG9-M13

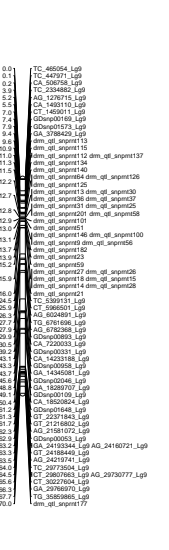

LG10-FH

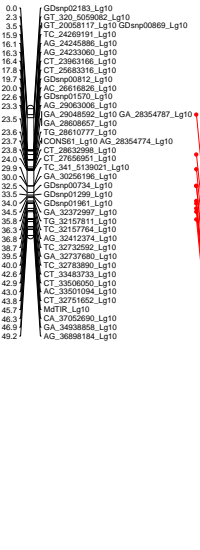

LG10-M13

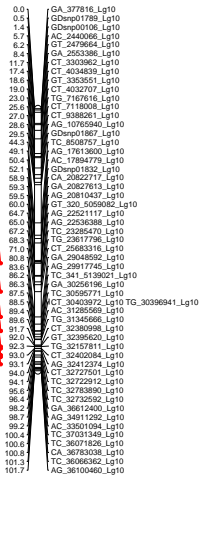

LG11-FH

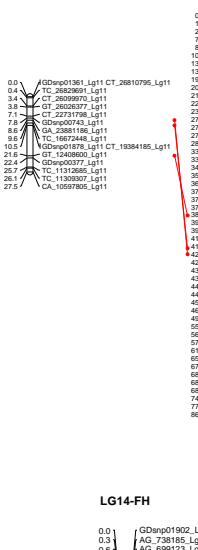

LG11-M13

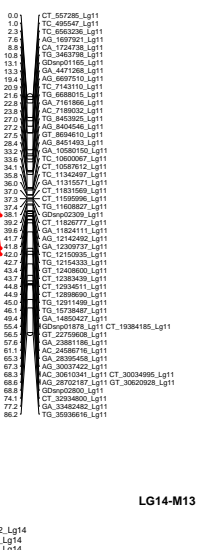

LG12-FH

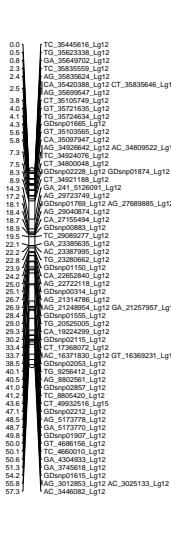

LG12-M13

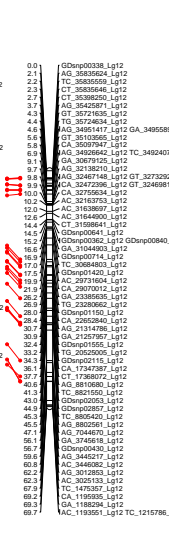

LG13-FH

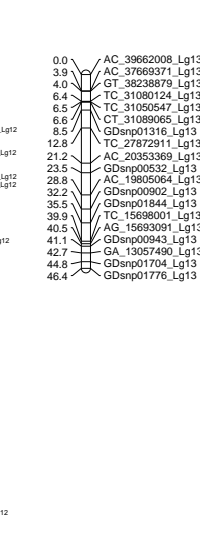

LG13-M13

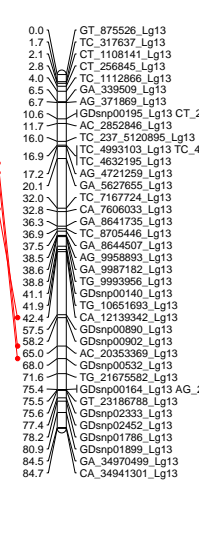

LG14-FH

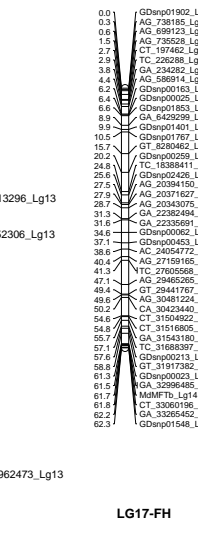

LG14-M13

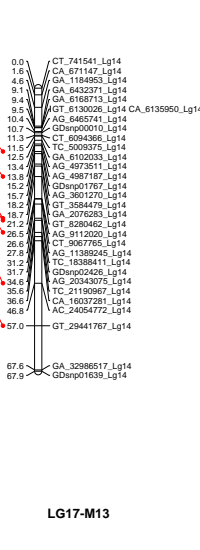

LG15-FH

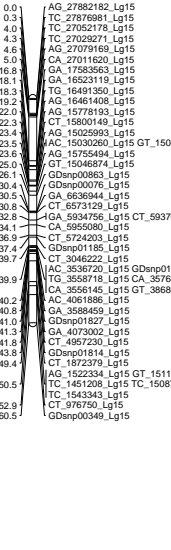

LG15-M13

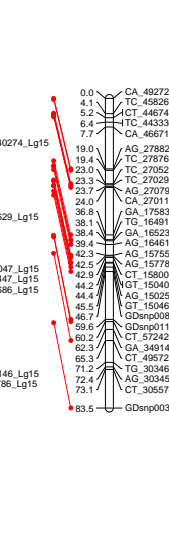

Supplement: Supplementary file 7 [file 14535983]
