# Supplementary material
Source: publisher figshare collection journal article supplement (https://frontiersin.figshare.com/ndownloader/files/14535983)
Supplement: Supplementary file 2 [file 14535983]

|                      | 1       | 10    | 20   | 30          | 40  | 50                               |
|----------------------|---------|-------|------|-------------|-----|----------------------------------|
| MdoICE1_MD09G1003800 | ..MLFPM | SSGA  | AMG  | CDED.....   | DAA | SWTRNSTTTHNNNNNEAEPRRNDQDSSLGASF |
| AthICE1_AT3G26744    | MGLDGN  | NGGGV | WLN  | GGGGEREE..  | NE  | EGSWGRNQE.....DGS                |
| AthICE2_AT1G12860    | .....M  | NSDG  | VWLD | GSGESPEVNNG | EAA | SWVRNP.....                      |

|                      | 60      | 70    | 80                      | 90          | 100                     |
|----------------------|---------|-------|-------------------------|-------------|-------------------------|
| MdoICE1_MD09G1003800 | SNFKSML | EGDWY | MNNVLSNPAQDLH.....      | AE          | SSAQASETTLAPLQPTDSSASCS |
| AthICE1_AT3G26744    | SQFKPML | EGDWT | SSNQPHQDQLQMLQNPDFRYFGG | EPFNPNDNLL  | L..QHSIDSSSSCS          |
| AthICE2_AT1G12860    | .....D  | EDWE  | NNPPPPQ.....            | HTNQNDFRFGG | EPLNPSENLLLLQQSIDSSSSS  |

|                      | 110   | 120   | 130          | 140   | 150                                 |
|----------------------|-------|-------|--------------|-------|-------------------------------------|
| MdoICE1_MD09G1003800 | PS.PA | FSLD  | PSQP.....    | PQQFL | PPKSCFSSLLNVVC.SNPPFDNSFDL          |
| AthICE1_AT3G26744    | PS.QA | FSLD  | PSQ.....     | QNQFL | STNNKGCLLNVPPSSANPPFDNAFE           |
| AthICE2_AT1G12860    | PLLHE | FTLDA | AASQQQQQQQQQ | QSF   | LATKACIVSLLNVPTINNNTF..DDFGFDSGLFLG |

|                      | 160            | 170   | 180     | 190         | 200  |
|----------------------|----------------|-------|---------|-------------|------|
| MdoICE1_MD09G1003800 | SFQGNQPSNSSVLM | GF    | FTALN   | SHAQMGTPELS | SSAE |
| AthICE1_AT3G26744    | QIH.....       | APISM | MGFGSLT | ..QLGNRDL   | SV   |
| AthICE2_AT1G12860    | QFHGN.HQSPNS   | MN    | FTGLN   | .....H      | SV   |

|                      | 210                | 220   | 230    | 240   | 250        |
|----------------------|--------------------|-------|--------|-------|------------|
| MdoICE1_MD09G1003800 | ..GFEGFDGSAG.AQLL  | NRAKL | .....  | LFPPM | GAQPTLFQKR |
| AthICE1_AT3G26744    | PLELEGFGSPANGGFVGN | NRAKV | LKPLEV | LASS  | GAQPTLFQKR |
| AthICE2_AT1G12860    | ...NSSGSCGLSPLFS   | NRAKV | LKPLQV | MASS  | GSQPTLFQKR |

|                      | 260           | 270   | 280  | 290      | 300   | 310        |
|----------------------|---------------|-------|------|----------|-------|------------|
| MdoICE1_MD09G1003800 | GPRYGGLESLEKK | RKRNE | EGE  | ...MEEGS | LDVSG | SLNYDSDDF  |
| AthICE1_AT3G26744    | GM.....       | RRFSD | DDMD | ..ETG    | IEVSG | SLNYESDEIN |
| AthICE2_AT1G12860    | SE.....       | MKKS  | SYRE | IDDTSTGI | IDIS  | SLNYESDHN  |

↑  
a

|                      | 320              | 330    | 340              | 350                    | 360 | 370 |
|----------------------|------------------|--------|------------------|------------------------|-----|-----|
| MdoICE1_MD09G1003800 | NSNANSTVTGVEGGDR | KGKKKG | LPAKNLMAERRRRKKL | NDRLYMLRSVVPKISKMDRASI |     |     |
| AthICE1_AT3G26744    | .....ESVQIGGGG   | KGKKKG | LPAKNLMAERRRRKKL | NDRLYMLRSVVPKISKMDRASI |     |     |
| AthICE2_AT1G12860    | .....NNN         | KGKKKG | LPAKNLMAERRRRKKL | NDRLYMLRSVVPKISKMDRASI |     |     |

Helix-loop-helix DNA-binding domain

|                      | 380     | 390    | 400         | 410 | 420       | 430              |
|----------------------|---------|--------|-------------|-----|-----------|------------------|
| MdoICE1_MD09G1003800 | LGDAIDY | LKELLQ | RINDLHNELES | APP | GSLP      | ASTSEHPLTPTPTSTL |
| AthICE1_AT3G26744    | LGDAIDY | LKELLQ | RINDLHNELES | TTP | GSLP      | PTPTSTL          |
| AthICE2_AT1G12860    | LGDAIDY | LKELLQ | RINDLHNELES | TTP | .....SSSL | HPLTPTPTQTL      |

↑  
b

|                      | 440    | 450  | 460   | 470            | 480     | 490       |
|----------------------|--------|------|-------|----------------|---------|-----------|
| MdoICE1_MD09G1003800 | L.SPK. | TQPK | VEVRV | REGRTVNIHMFCS  | RRPGLLL | STMRALDNL |
| AthICE1_AT3G26744    | LPSPK  | GQAR | VEVRV | LREGRAVNIHMFCS | RRPGLLL | ATMKALDNL |
| AthICE2_AT1G12860    | LPSPK  | GQAR | VEVRV | LREGRTVNIHMFCS | RRPGLLL | STMRALDNL |

↑  
c

|                      | 500      | 510     | 520             |
|----------------------|----------|---------|-----------------|
| MdoICE1_MD09G1003800 | LDVFRAEQ | CREN.QF | LPEQIKAVILDSACF |
| AthICE1_AT3G26744    | LDVFRAEQ | QEGQEI  | LPDOIKAVILDTAGY |
| AthICE2_AT1G12860    | LDVFRAEQ | QEDHDV  | LPEQIKAVILDTAGY |
