# Supplementary material
Source: publisher figshare collection journal article supplement (https://frontiersin.figshare.com/ndownloader/files/14535983)

# A

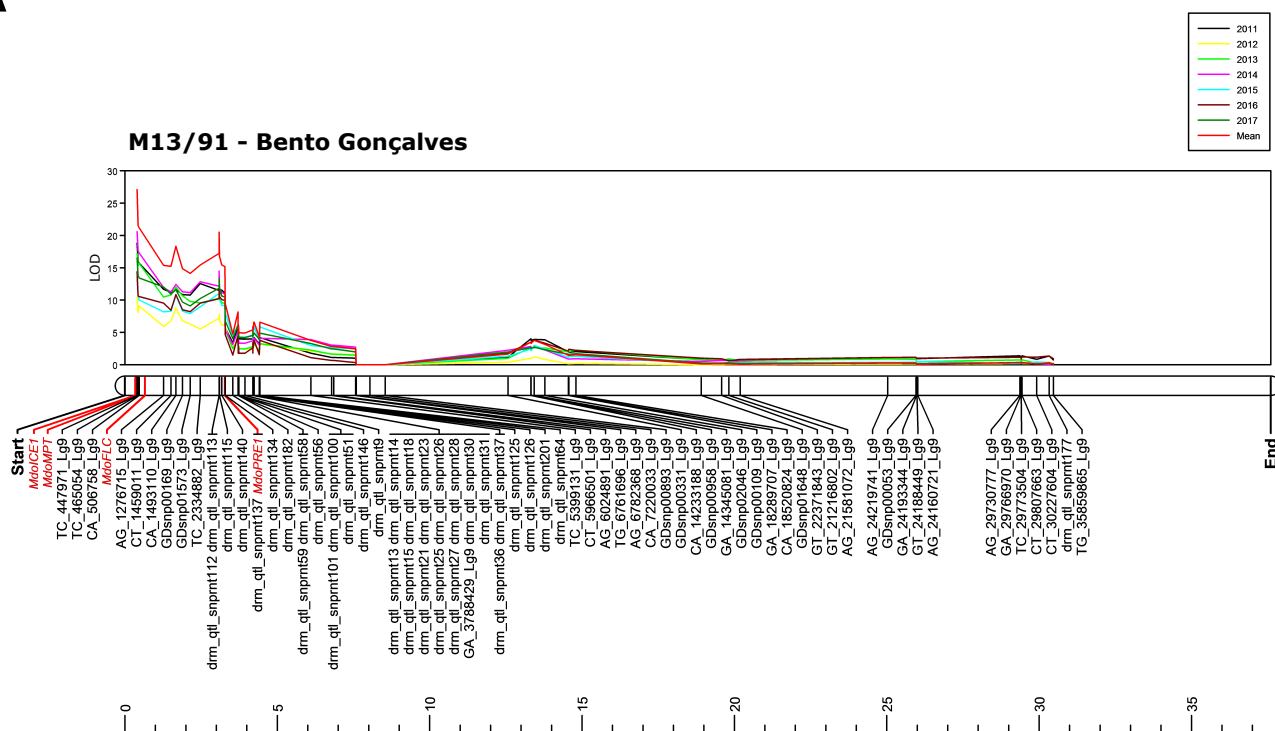

# B

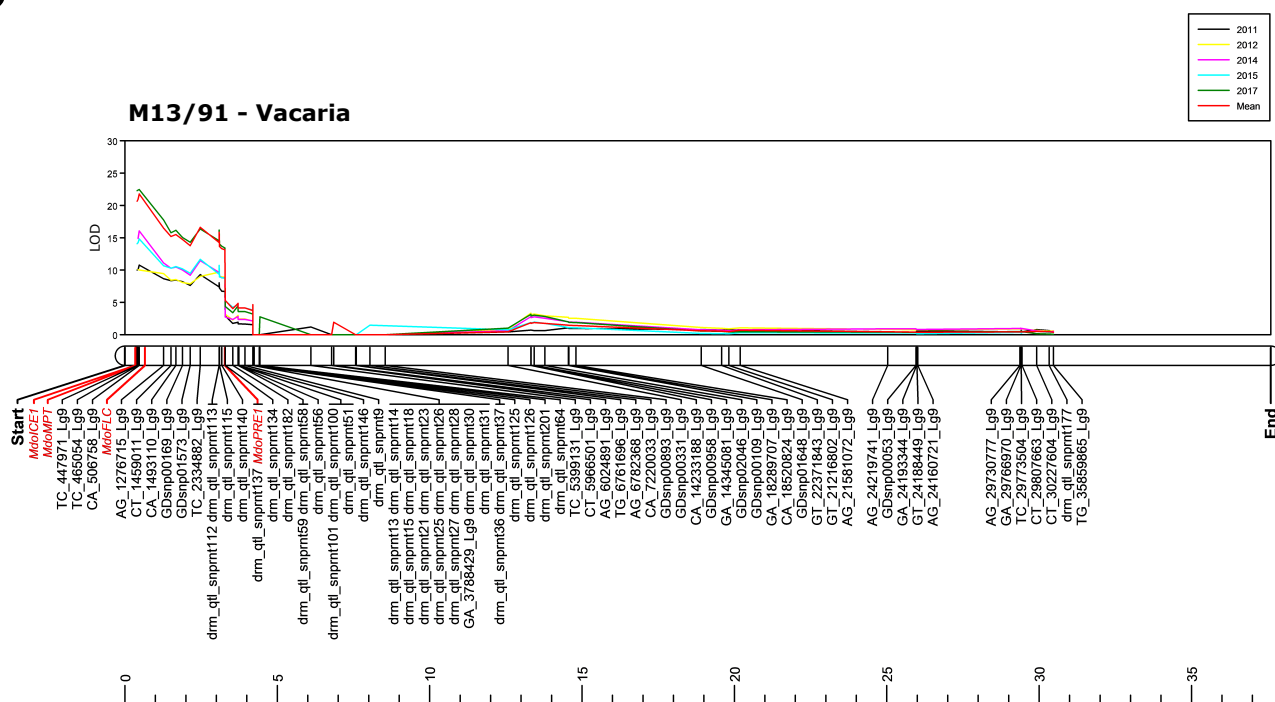

Supplement: Supplementary file 1 [file 14535983]

(A) Bento Gonçalves - BG

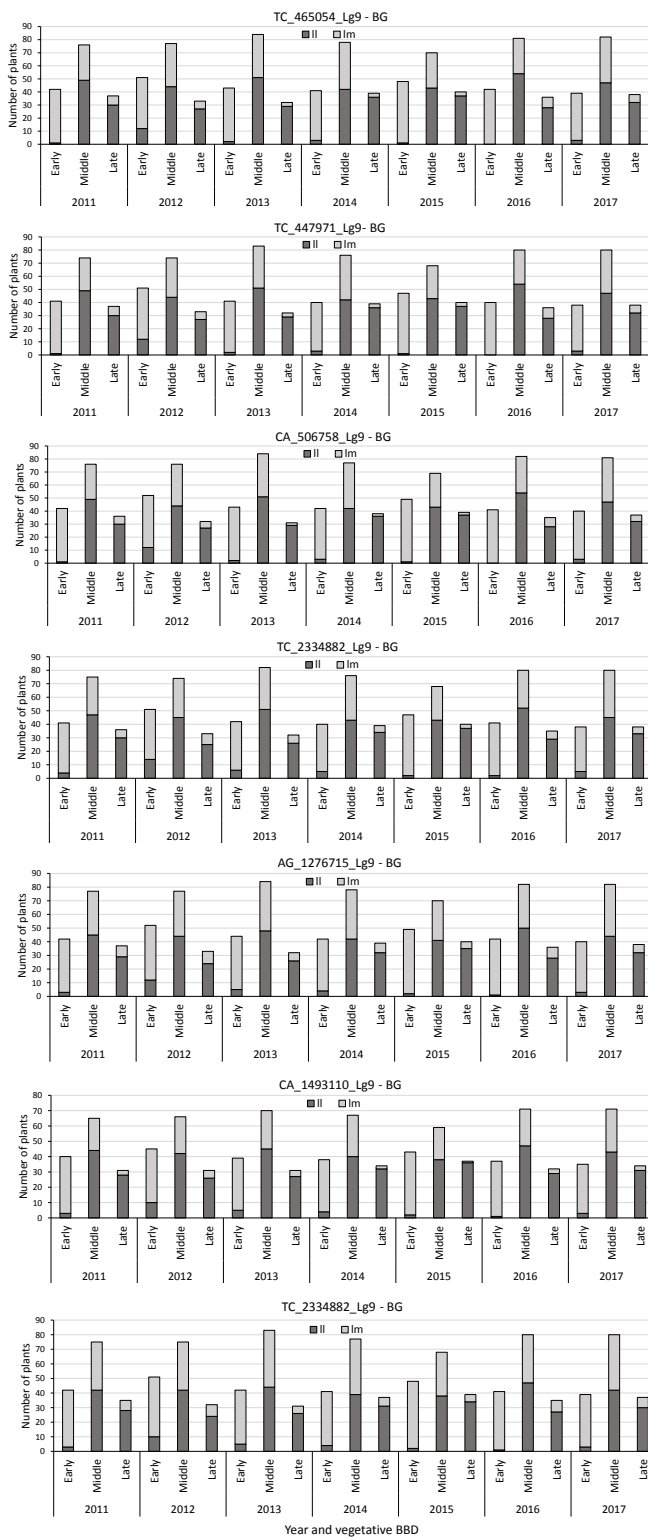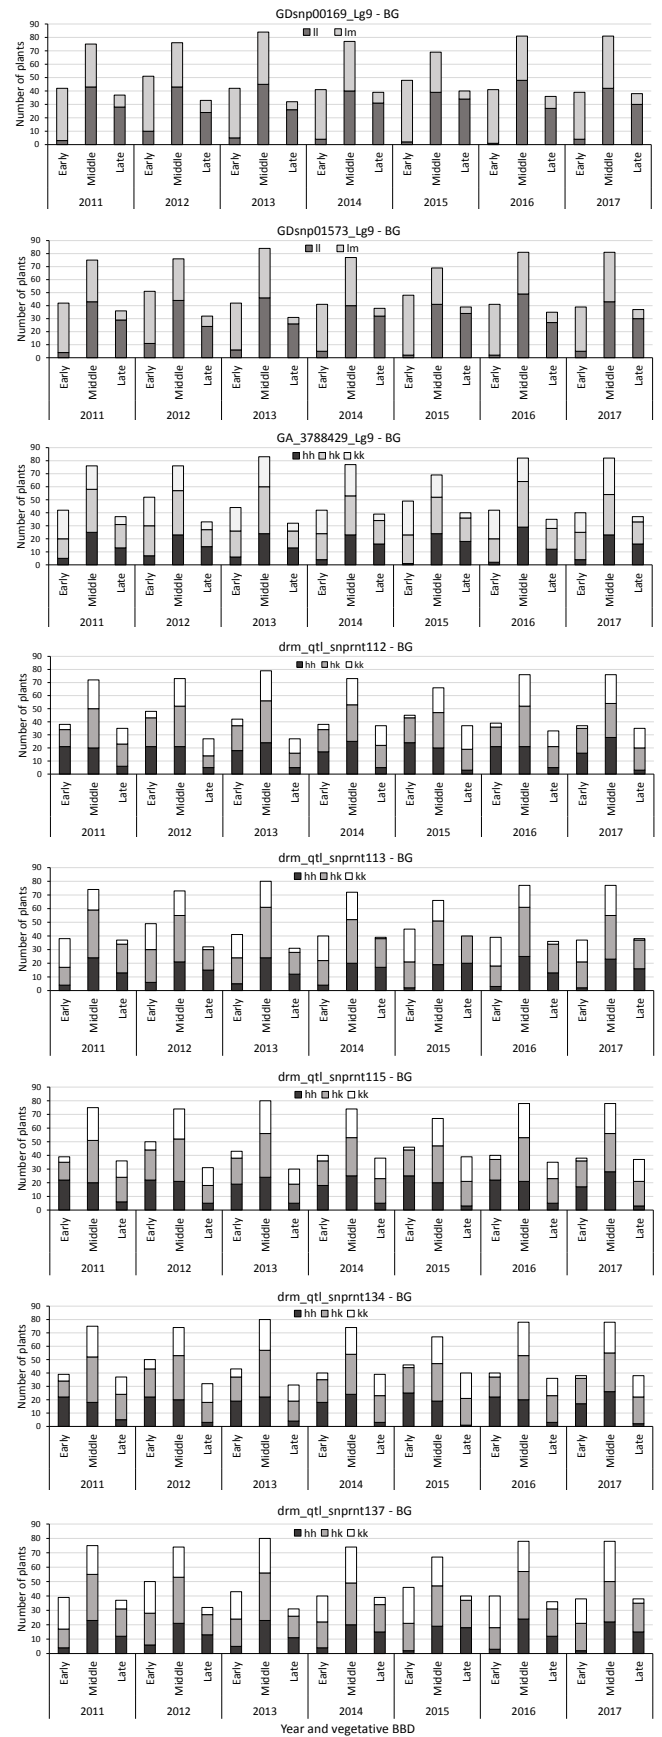

(B) Vacaria - VC

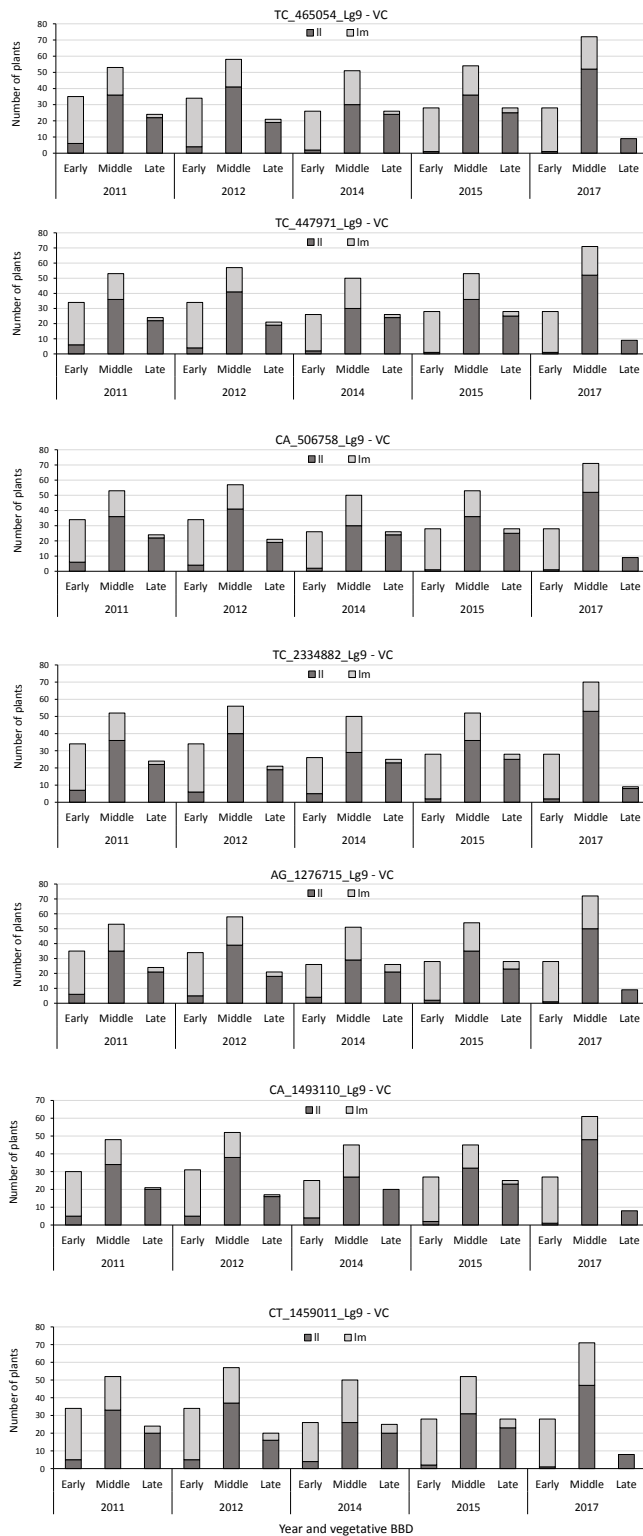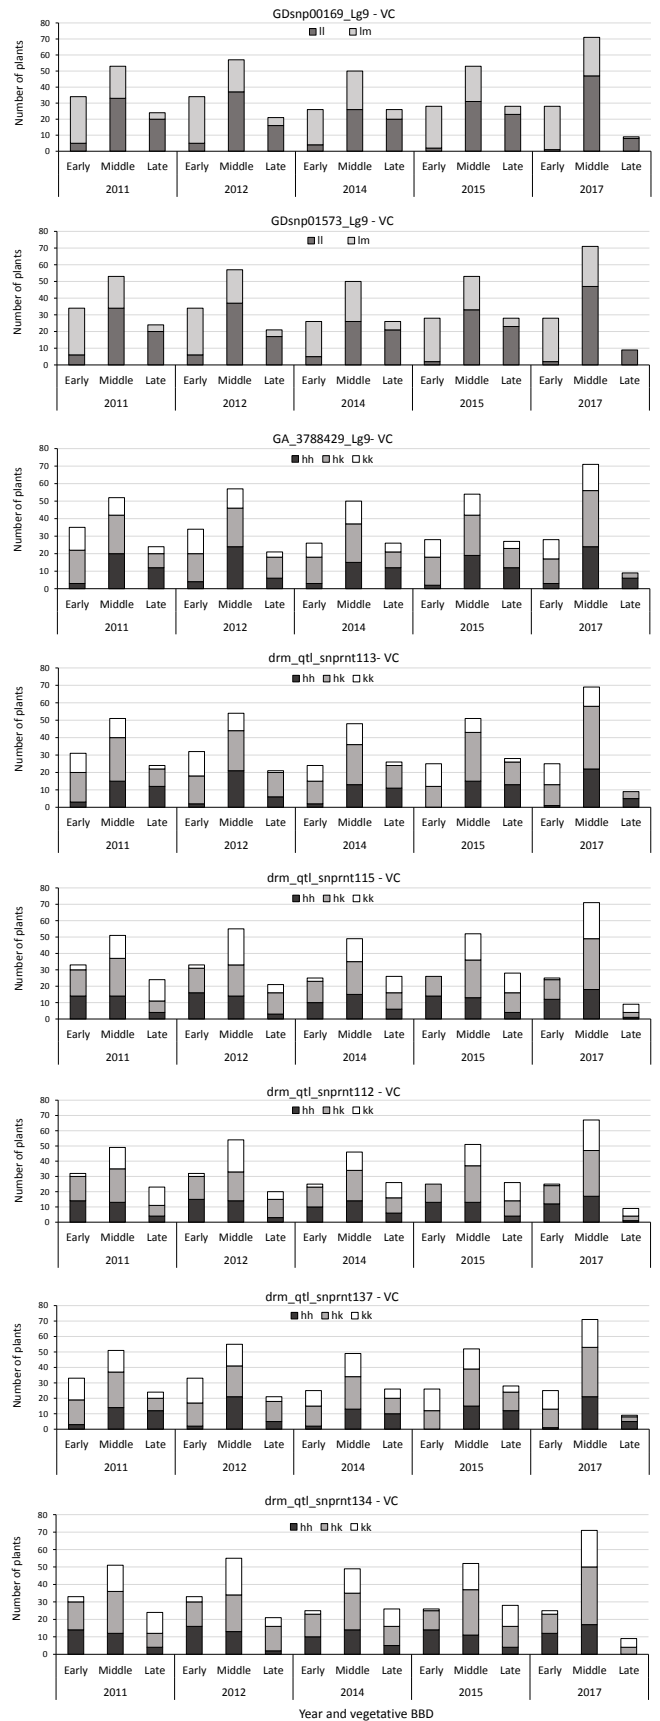

Supplement: Supplementary file 3 [file 14535983]

Supplementary Figure 5

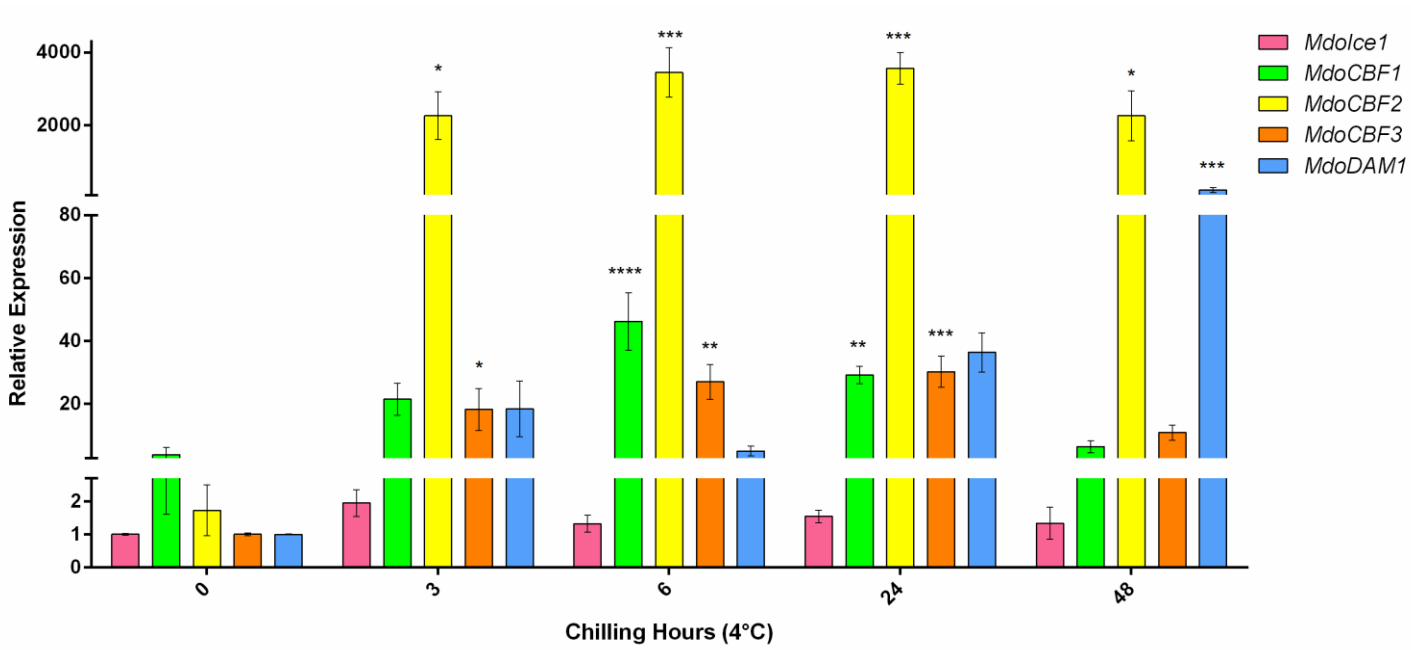

Supplement: Supplementary file 5 [file 14535983]

# Supplementary Figure 4

A

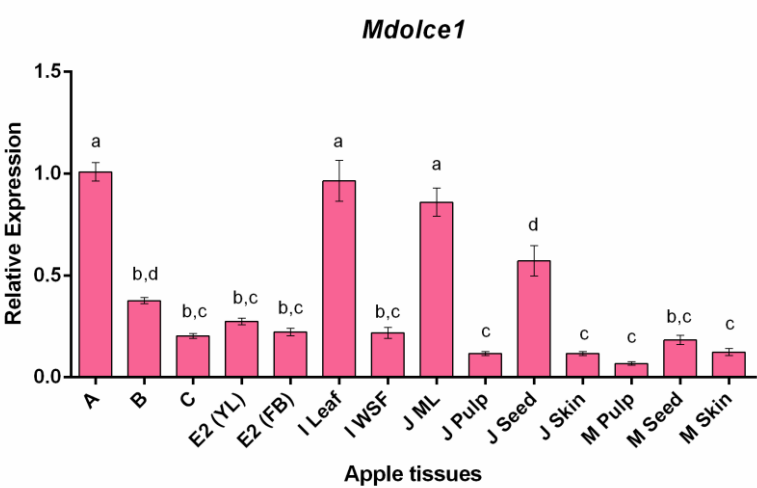

B

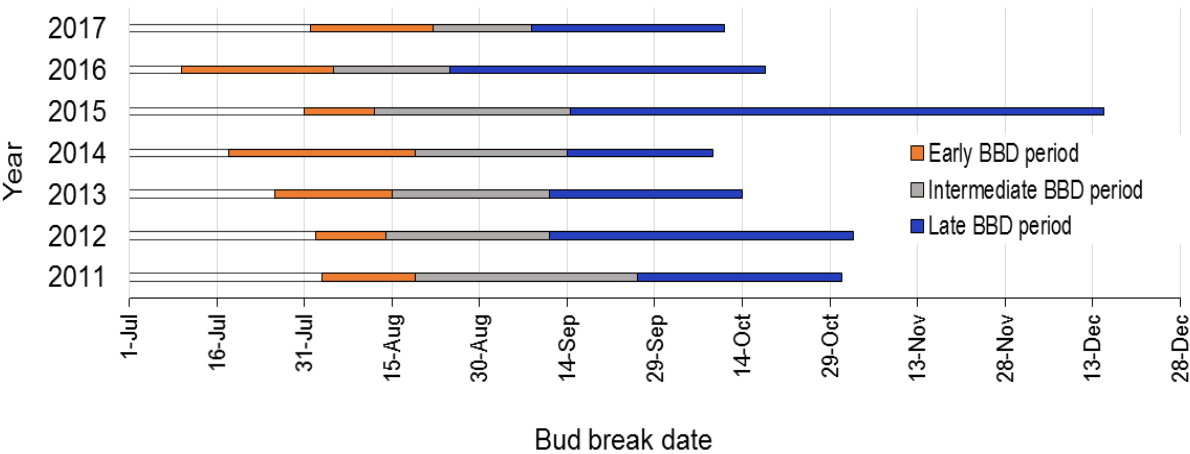

C

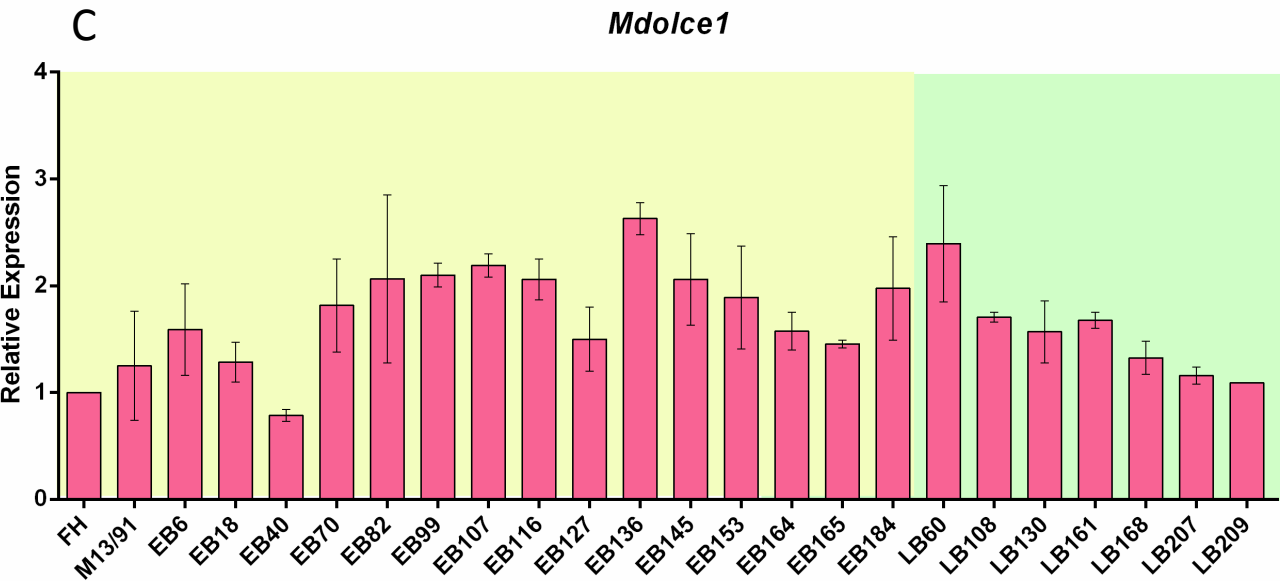

Supplement: Supplementary file 6 [file 14535983]
